# Supplementary material for: BaCe0.25Mn0.75O3−δ—a promising perovskite-type oxide for solar thermochemical hydrogen production
Source: Royal Society of Chemistry journal article supplement (doi:10.1039/c8ee01989d), 2018-01-01
Supplement: c8ee01989d1.pdf [file c8ee01989d1.pdf]

## Supplementary Information Manuscript

BaCe<sub>0.25</sub>Mn<sub>0.75</sub>O<sub>3-δ</sub> — A promising perovskite-type oxide for solar thermochemical hydrogen production

Debora R. Barcellos, Michael Sanders, Jianhua Tong<sup>□</sup>, Anthony H. McDaniel<sup>□</sup>, Ryan O'Hayre

Colorado School of Mines, Department of Metallurgical and Materials Engineering, Golden, CO, USA

<sup>□</sup>Clemson University, Clemson, Materials Science and Engineering, SC, USA

<sup>□</sup>Sandia National Laboratories, Combustion Research Facility, Livermore, CA, USA

### Theoretical bond strength analysis

The  $E_v$  values provided in Table 1 column 3 were calculated according to Deml's<sup>1</sup> model equation:

$$E_v = 0.67 \left[ |\Delta H_f| + 0.6 \left( E_{O\ 2p} + \frac{1.5}{2} E_g^{DFT+U} \right) + 2.6 \langle \Delta \chi \rangle \right] - 1.49$$

where  $\Delta H_f$  is the oxide formation enthalpy in eV/atom,  $E_{O\ 2p}$  is the energy difference between the valence band maximum and the center of the O 2p band in eV (inferred from DOS diagrams reported in the literature),  $E_g^{DFT+U}$  is the calculated band gap in eV, and  $\Delta \chi$  is the unitless average Pauling electronegativity difference between O atoms and the atoms forming their first coordination shell, meaning O electronegativity subtracted from Mn and Ce electronegativities. The quantities used for BMO and BCO are given in Table S1.

**Table S1** – Reported calculated values used to approximate the oxygen vacancy formation energy

| Compound           | $\Delta H_f$ (eV/ atom) | $E_{O\ 2p}$ (eV) | $E_g^{DFT+U}$ (eV) | $\Delta \chi$ |
|--------------------|-------------------------|------------------|--------------------|---------------|
| BaMnO <sub>3</sub> | 2.0 <sup>2</sup>        | 1.0 <sup>3</sup> | 1.6 <sup>3</sup>   | 1.9           |
| BaCeO <sub>3</sub> | 17.5 <sup>4</sup>       | 0.8 <sup>5</sup> | 1.5 <sup>5</sup>   | 2.3           |

### X-ray diffraction analysis

Figure S1 demonstrates the XRD patterns obtained for the  $\text{BaCe}_x\text{Mn}_{1-x}\text{O}_3$  samples synthesized, where  $x = 0, 0.05, 0.15, 0.25, 0.50, 0.75$  and  $1$  named respectively as BMO, BC05M95, BC15M85, BC25M75 (BCM), BC50M50, BC75M25 and BCO.

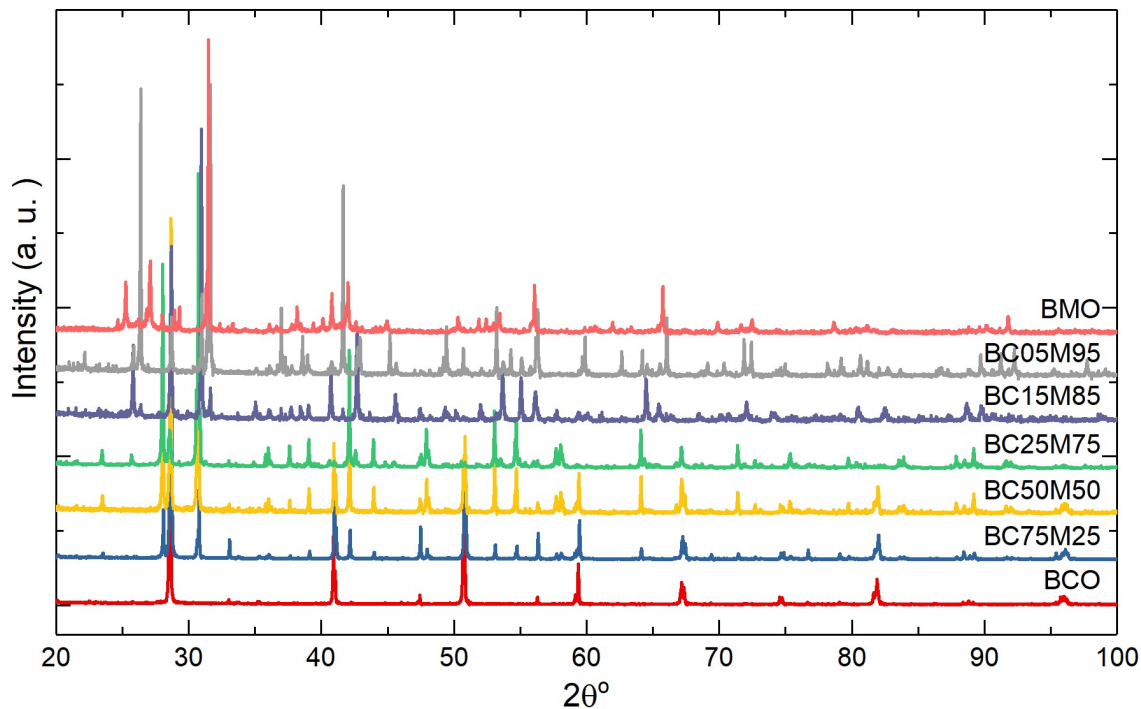

**Figure S1** - X-ray diffraction comparison between the samples  $\text{BaCe}_x\text{Mn}_{1-x}\text{O}_3$ , where  $x = 0, 0.05, 0.15, 0.25, 0.50, 0.75$ , and  $1$ .

From the diffraction patterns, it can be noticed that the pure phase structures predicted could not be achieved, but instead a mixture of crystal structures compose most of the samples. It can also be noticed that the samples BC25M75, BC50M50 and BC75M25 have the phases  $\text{BaCe}_{0.25}\text{Mn}_{0.75}\text{O}_{3-\delta}$  (R-3m),  $\text{BaCeO}_3$  (Pnma) and  $\text{CeO}_2$  (Fm-3m) in common. Rietveld refinement results are shown in Table S1. Rietveld Refinement quantification was not possible for samples BC05M95 and BC15M85 due to the multitude of secondary phases formed.

**Table S2** - Crystal structures determined from Rietveld Refinement for each of the 5 samples studied.

| Sample             | $\text{BaCe}_{0.25}\text{Mn}_{0.75}\text{O}_3$ | $\text{BaCeO}_3$ | $\text{CeO}_2$ | $\text{Ba}_5\text{Ce}_{1.25}\text{Mn}_{3.75}\text{O}_{15}$ | other |
|--------------------|------------------------------------------------|------------------|----------------|------------------------------------------------------------|-------|
| Space Group (ICSD) | R-3m (166)                                     | Pnma (62)        | Fm-3m (225)    | $P6_3/mmc$ (194)                                           | -     |

|                   |     |     |     |     |                                                                                                                                                                                                                                                              |
|-------------------|-----|-----|-----|-----|--------------------------------------------------------------------------------------------------------------------------------------------------------------------------------------------------------------------------------------------------------------|
| BMO               | -   | -   | -   | -   | 58% BaMnO <sub>3</sub><br>R-3m (166)<br>28% Ba <sub>6</sub> Mn <sub>5</sub> O <sub>16</sub> /<br>Ba <sub>4</sub> Mn <sub>3</sub> O <sub>10</sub><br>Cmca (64)<br>7% BaMnO <sub>3</sub><br>P63 mc (186)<br>7% Mn <sub>3</sub> O <sub>4</sub><br>I41/amd (141) |
| BC25M75           | 83% | -   | 3%  | 14% | -                                                                                                                                                                                                                                                            |
| BC25M75<br>cycled | 95% | 3%  | 1%  | 1%  | -                                                                                                                                                                                                                                                            |
| BC50M50           | 61% | 36% | 3%  | -   | -                                                                                                                                                                                                                                                            |
| BC75M25           | 28% | 58% | 14% | -   | -                                                                                                                                                                                                                                                            |
| BCO               | -   | 94% | 6%  | -   | -                                                                                                                                                                                                                                                            |

It is evident from the Rietveld refinement results that there is only one exact amount of Ce that can be added to the structure to form the Ce/Mn shared B-site layered perovskite, which is 0.25 mol of Ce and 0.75 mol of Mn.

This behavior was confirmed in the literature by Fuentes et al. It was indicated that although predictions suggest the potential occurrence of other amounts of Ce in the B-site, affecting the layering sequence, however no attempts to synthesize BaCe<sub>x</sub>Mn<sub>1-x</sub>O<sub>3</sub> with different amounts of Ce were successful.

Macias et al. though were able to synthesize a polytype of the BaCe<sub>0.25</sub>Mn<sub>0.75</sub>O<sub>3-δ</sub> (R-3m), identified as 10H-Ba<sub>5</sub>Ce<sub>1.25</sub>Mn<sub>3.75</sub>O<sub>15</sub> (P63/mmc). This polytype has the same stoichiometric cation ratios Ba:Ce:Mn, respectively, 1:0.25:0.75, but has a difference in symmetry, forming a hexagonal structure. We were able to obtain this structure in very small quantity (14 %) in the BC25M75 sample. However, after one TPR cycle, (Figure S2), where the sample was reduced at a high temperature and then re-oxidized at a lower temperature, the polytype structure disappeared, forming a purer sample (95 % of the 12R structure with simple oxides as secondary phases).

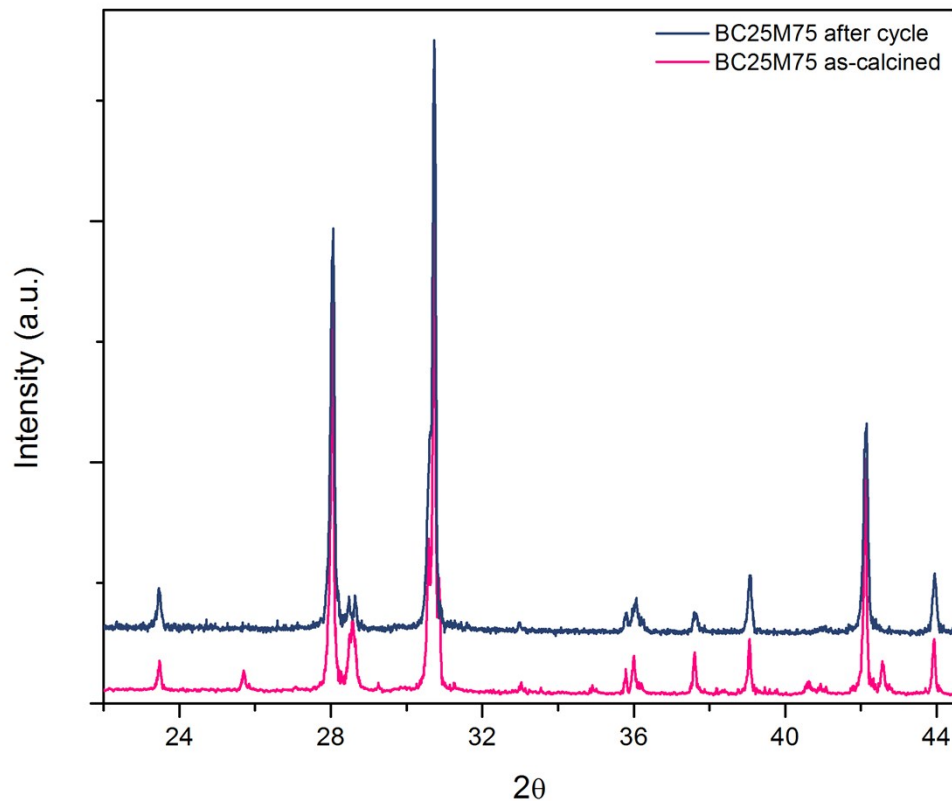

**Figure S2** – X-ray diffraction results for BC25M75 sample as calcined and after the first TPR cycle (reduction at 1350 °C and re-oxidation at 1000 °C) shows the increase of the 12R structure and decrease of the 10H structure.

### Temperature Programmed Reduction

The extent of the reduction, as well as the onset temperatures from the Temperature Programmed Reduction (TPR) experiment, are summarized on Table S3. The onset temperatures were obtained at the temperature where  $\delta$  is equal to 0.025. The BC25M75 onset temperature is similar to SLMA, but lower than ceria.

**Table S3** - Extent of reduction and onset temperature at  $\delta = 0.025$ . Data obtained from TPR experiment where  $T_{RE}$  1350 °C at 10 °C/min and held for 4 h and  $T_{OX}$  1000 °C.

|       | Extent of reduction (mol O/ mol sample) or ( $\delta$ ) | Onset Temperature (°C) at $\delta = 0.025$ |
|-------|---------------------------------------------------------|--------------------------------------------|
| Ceria | 0.049                                                   | 1270                                       |
| BCO   | 0.039                                                   | 900                                        |

|         |       |      |
|---------|-------|------|
| SLMA    | 0.088 | 1230 |
| BC75M25 | 0.157 | 620  |
| BC50M50 | 0.103 | 1300 |
| BCM     | 0.182 | 850  |
| BC15M85 | 0.227 | 1200 |
| BC05M95 | 0.345 | 950  |
| BMO     | 0.424 | 790  |

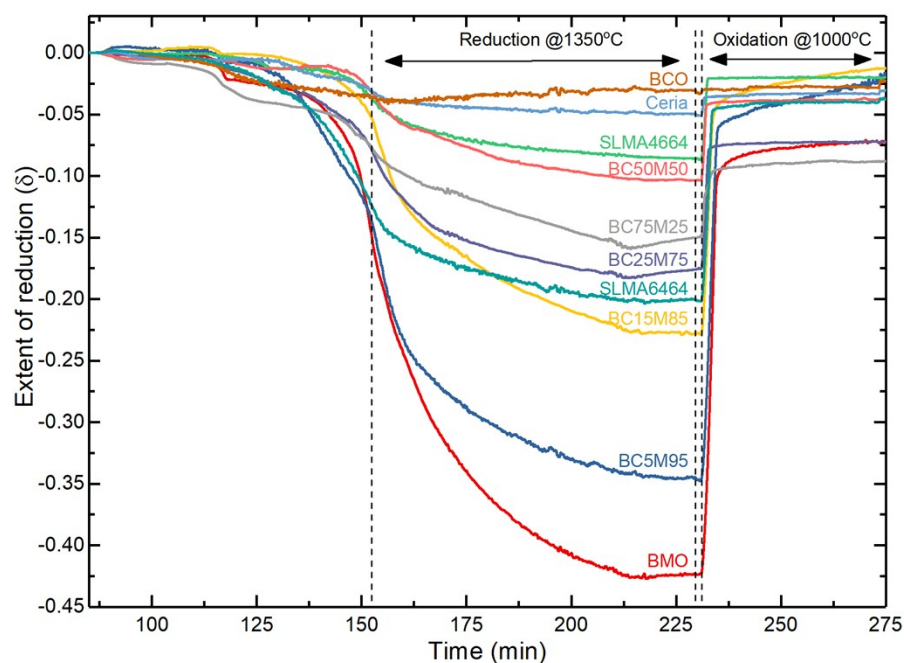

**Figure S3** – Temperature Programmed Reduction experiment evaluates the extent of reduction (formation of oxygen vacancies or  $\delta$ ) and reversibility of samples BCO, ceria, SLMA, BC75M25, BC50M50, BC25M75, BC15M85, BC05M95 and BMO. Reduction at 1350 °C for 1 h in UHP N<sub>2</sub> and Oxidation in air at 1000 °C.

The compositions between BCO and BMO generally follow the trend of manganese rich phases reducing further than ceria rich phases, though the BC75M25 and BC50M50 positions reverse. This trend would likely be expected to hold if all compositions were single phase “alloys” of the two end members, but since the compositions are mixed-phase, the deviations should perhaps be unsurprising.

TPR was performed on the BCM sample, where three consecutive reduction (1350 °C) and oxidation (1000 °C) cycles are shown in Figure S4.

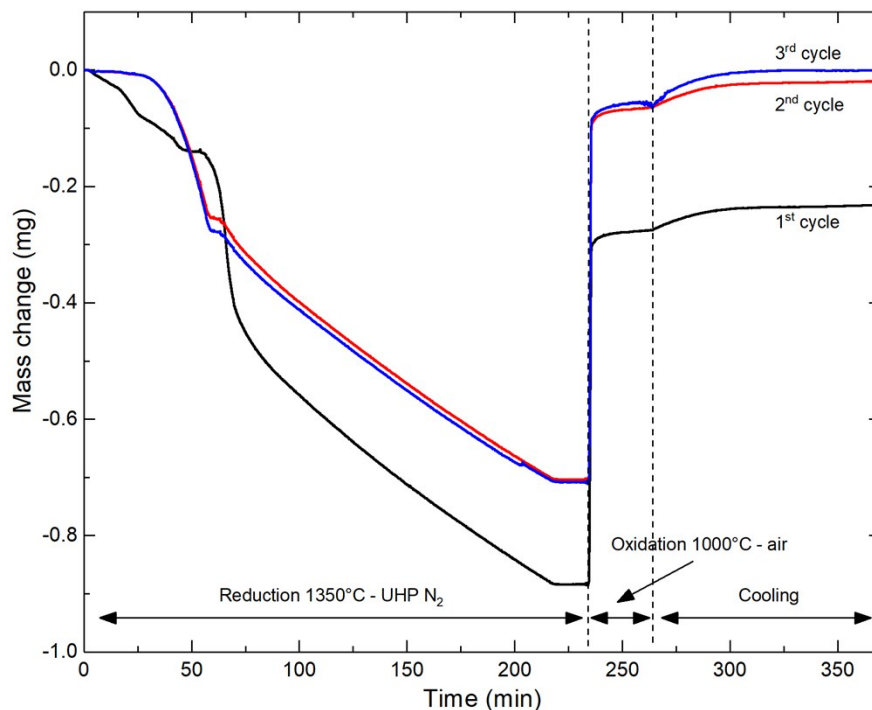

**Figure S4** – BCM three consecutive reduction and oxidation cycles at 1350 °C in UHP N<sub>2</sub> for 4 h and 1000 °C for 30 min in air respectively. The experiment indicates that after the first redox cycle BCM two polytypes were all converted to the main phase 12R.

Figure S4 suggests that the first BCM cycle reduces to a higher extent and doesn't completely recover its mass. However, upon further cycling the sample demonstrates complete redox reversibility. This behavior might be attributed to the 10H secondary phase conversion to 12R primary phase, as shown by XRD.

#### **Water-splitting experiments using Stagnation Flow Reactor**

The three samples BC25M75 (BCM), SLMA and ceria (powder samples of surface area 0.20 m<sup>2</sup>/g, 0.99 m<sup>2</sup>/g and 2.24 m<sup>2</sup>/g respectively) were tested for water splitting under various T<sub>OX</sub> and T<sub>RE</sub> conditions. The experiment was accomplished at Sandia in the Stagnation Flow Reactor (SFR) as described in the experimental section. Three oxidation temperatures and three reduction temperatures were probed maintaining the same reduction and oxidation times of 330 s and 20 min respectively, except for ceria where the oxidation hold time was only of 5 minutes. 40 vol. % of steam was used in all conditions. The average of the amounts of hydrogen produced per mass of material during each cycle is reported in Table S4 and plotted in Figure S5a and S5b.

**Table S4-** Hydrogen production ( $\mu\text{mol/g}$  of sample) at  $T_{\text{OX}}$  (750 °C, 850 °C and 1000 °C) and  $T_{\text{RE}}$  (1250 °C, 1350 °C) with 40 vol. % steam.

| $T_{\text{OX}}$ (°C) | Sample | $T_{\text{RE}}$ (°C) |      |      |
|----------------------|--------|----------------------|------|------|
|                      |        | 1250                 | 1350 | 1400 |
| 750                  | BCM    | 52                   | 99   | 136  |
|                      | SLMA   | 74                   | 150  | 205  |
|                      | Ceria  | 28                   | 46   | 67   |
| 850                  | BCM    | 56                   | 139  | 165  |
|                      | SLMA   | 89                   | 194  | 256  |
|                      | Ceria  | 26                   | 50   | 68   |
| 1000                 | BCM    | 86                   | 146  | 181  |
|                      | SLMA   | 105                  | 224  | 292  |
|                      | Ceria  | 26                   | 53   | 71   |

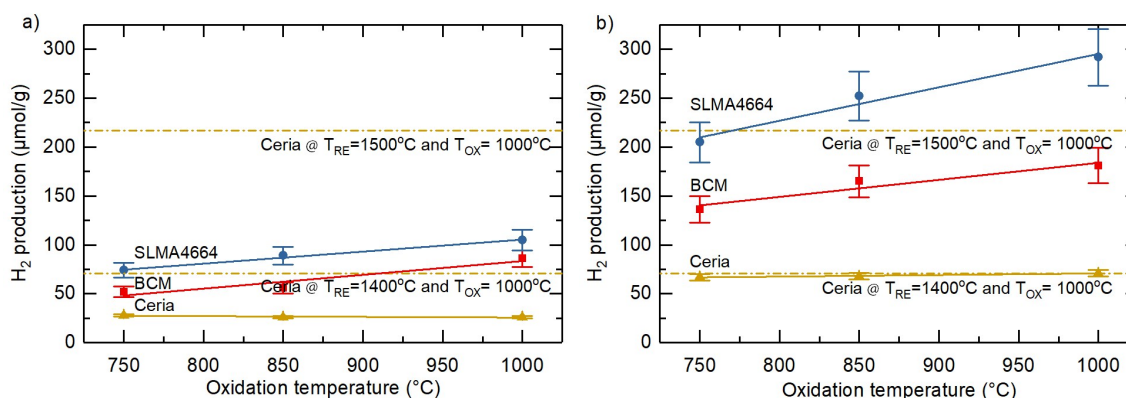

**Figure S5** - Total H<sub>2</sub> produced per cycle by BCM (red), SLMA (blue) and Ceria (yellow) at a)  $T_{\text{RE}}$  of 1250 °C and b)  $T_{\text{RE}}$  of 1400 °C with 40% steam and various oxidation temperatures. Reduction heating rate is 10 °C/s, with a reduction time of 330 s and a reoxidation time of 1200 s.

In considering this comparative analysis of ceria, BCM, and SLMA4664, it should be noted that at  $T_{\text{RE}}$  1350 °C and  $T_{\text{OX}}$  1000 °C, we have previously reported per-cycle SLMA4664 H<sub>2</sub> production values significantly higher (as high as 277  $\mu\text{mol/g}$ <sup>11</sup>) than those presented here. STCH H<sub>2</sub> yield is highly sensitive to cycle time. In the present analysis, we used a 330 s reduction time to better match realistic STCH reactor cycle durations. In our previous work, a reduction time of 1800 s was used,<sup>11</sup> which increases the extent of reduction and thus increases the measured water splitting capacity of the material.

In the main text, BCM's water splitting performance was compared to STCH 4664 and ceria under identical testing conditions. Direct comparison with other promising materials reported in the literature is not easy because of the diversity of cycle conditions used. A brief list of some of other promising materials for STCH reported in the literature can be found in Table S5 below.

**Table S5** – Non-exhaustive list of promising STCH materials reported in the literature for comparison of performance.

| Material                                                                               | H <sub>2</sub> production (μmol/g) | Reduction step conditions | Oxidation step conditions                                           |
|----------------------------------------------------------------------------------------|------------------------------------|---------------------------|---------------------------------------------------------------------|
| BaCe <sub>0.25</sub> Mn <sub>0.75</sub> O <sub>3</sub>                                 | 140 (this work)                    | 1350 °C for 330 s         | 850 °C for 1200 s – 40 vol% H <sub>2</sub> O                        |
| CeO <sub>2</sub>                                                                       | 220 (this work)                    | 1500 °C for 330 s         | 1000 °C for 1200 s – 40 vol% H <sub>2</sub> O                       |
| CeO <sub>2</sub>                                                                       | 75 (this work)                     | 1400 °C for 330 s         | 1000 °C for 1200 s – 40 vol% H <sub>2</sub> O                       |
| CeO <sub>2</sub>                                                                       | 50 (this work)                     | 1350 °C for 330 s         | 850 °C for 1200 s – 40 vol% H <sub>2</sub> O                        |
| Ce <sub>0.75</sub> Zr <sub>0.25</sub> O <sub>2</sub>                                   | 354 <sup>6</sup>                   | 1400 °C for 45 min        | 1000 °C for 35 min – 80 % RH                                        |
| Ce <sub>0.75</sub> Zr <sub>0.25</sub> O <sub>2</sub>                                   | 162 <sup>7</sup>                   | 1450 °C for 45 min        | 950 °C for 25 min – 80 % RH                                         |
| Ce <sub>0.85</sub> Fe <sub>0.15</sub> O <sub>2</sub>                                   | 536 <sup>8</sup>                   | 1500 °C for 30 min        | 1150 °C for 30 min – pH <sub>2</sub> O 0.5-0.84 atm                 |
| Ce <sub>0.85</sub> Co <sub>0.15</sub> O <sub>2</sub>                                   | 768 <sup>8</sup>                   | 1500 °C for 30 min        | 1150 °C for 30 min – pH <sub>2</sub> O 0.5-0.84 atm                 |
| Ce <sub>0.85</sub> Ni <sub>0.15</sub> O <sub>2</sub>                                   | 688 <sup>8</sup>                   | 1500 °C for 30 min        | 1150 °C for 30 min – pH <sub>2</sub> O 0.5-0.84 atm                 |
| Ce <sub>0.85</sub> Mn <sub>0.15</sub> O <sub>2</sub>                                   | 491 <sup>8</sup>                   | 1500 °C for 30 min        | 1150 °C for 30 min – pH <sub>2</sub> O 0.5-0.84 atm                 |
| Sr <sub>0.4</sub> La <sub>0.6</sub> Mn <sub>0.6</sub> Al <sub>0.4</sub> O <sub>3</sub> | 194 (this work)                    | 1350 °C for 330 s         | 850 °C for 1200 s – 40 vol% H <sub>2</sub> O                        |
| Sr <sub>0.4</sub> La <sub>0.6</sub> Mn <sub>0.6</sub> Al <sub>0.4</sub> O <sub>3</sub> | 307 <sup>9</sup>                   | 1350 °C for 30 min        | 1000 °C for 1000 s – 40 vol% H <sub>2</sub> O                       |
| Sr <sub>0.6</sub> La <sub>0.4</sub> Mn <sub>0.6</sub> Al <sub>0.4</sub> O <sub>3</sub> | 277 <sup>9</sup>                   | 1350 °C for 30 min        | 1000 °C for 1000 s – 40 vol% H <sub>2</sub> O                       |
| Sr <sub>0.4</sub> La <sub>0.6</sub> Mn <sub>0.4</sub> Al <sub>0.6</sub> O <sub>3</sub> | 220 <sup>9</sup>                   | 1350 °C for 30 min        | 1000 °C for 1000 s – 40 vol% H <sub>2</sub> O                       |
| CaTi <sub>0.7</sub> Fe <sub>0.3</sub> O <sub>3</sub>                                   | 39 <sup>9</sup>                    | 1400 °C for 30 min        | 1100 °C for 1000 s – 40 vol% H <sub>2</sub> O                       |
| (FeMgCoNi)O <sub>x</sub>                                                               | 450 <sup>10</sup>                  | 1300 °C for 5 h           | 800 °C for 5 h – 9.5 vol% H <sub>2</sub> O w/ 91 ppm H <sub>2</sub> |
| (FeMgCoNi)O <sub>x</sub>                                                               | 150 <sup>10</sup>                  | 1300 °C for 30 min        | 800 °C for 1 h – 9.5 vol% H <sub>2</sub> O w/ 91 ppm H <sub>2</sub> |



## Numerical kinetics analysis

The kinetic behavior of the samples was analyzed by using a numerical approach developed by McDaniel et al. to separate the solid-state chemistry kinetic process from mainly three other events: 1- the time it takes for steam to enter the reactor, 2- the time lag of detection and 3- the dispersion effects of H<sub>2</sub> being produced and transported to the detector. A simulated oxidation experiment was performed where an empty zirconia boat was held at two oxidation temperatures 850 °C and 1000 °C. Instead of only steam, trace amounts of hydrogen in 40 vol. % steam were inserted in the reactor and detected in the mass spectrometer. The effects of the three events intrinsic to the experiment setup are then numerically determined by fitting a continuous stirred tank reactor (CSTR) model consisting, in this case of seven serial tanks to the resulting hydrogen signal. The fitted parameters for the reactor can then be applied to simple kinetic model curves, such as reaction-order, diffusion among other ones to produce simulated hydrogen production curves. Finally, using numerical methods, the kinetic model parameters are adjusted to fit the simulated curve to the actual experimental data and therefore extract the true rate-governing mechanisms in the materials such as surface reactions and bulk diffusion. The computational methods are discussed in further detail in McDaniel et al.<sup>9</sup> and Scheffe et al.<sup>12</sup>. Table S6 compiles the fitted parameters for the reactor using four blank runs.

**Table S6** – Fitted parameters for the reactor calculated from four blank runs that used 2 sccm and 4 sccm trace amount of H<sub>2</sub> (5 % H<sub>2</sub> balanced in Ar) mixed in the 40 vol. % steam flow.

| T <sub>OX</sub> (°C) | Mixing model identification | Trace H <sub>2</sub> flow (sccm) | t <sub>0</sub> (s) | tau    |
|----------------------|-----------------------------|----------------------------------|--------------------|--------|
| 850                  | M850-1                      | 2                                | 17.7               | 0.2617 |
|                      | M850-2                      | 2                                | 20.7               | 0.2887 |
|                      | M850-3                      | 4                                | 18.4               | 0.2740 |
|                      | M850-4                      | 4                                | 19.2               | 0.2929 |
| 1000                 | M1000-1                     | 2                                | 19.0               | 0.2613 |
|                      | M1000-2                     | 2                                | 16.2               | 0.2486 |
|                      | M1000-3                     | 4                                | 17.5               | 0.2580 |
|                      | M1000-4                     | 4                                | 18.2               | 0.2741 |

Tables S7 and S8 compile the calculated rate constants for each material and condition using all the four mixing models. The r-square is also reported as an indication of fitting suitability. An average of the rate constants as well as the standard deviation for each  $T_{OX}$  condition and material is reported in the main manuscript.

**Table S7-** Rate constants calculated for BCM using the four different mixing models at 850 °C and 1000 °C.

| $T_{OX}$ (°C) | H <sub>2</sub> peak | Mixing model | k <sub>0</sub> | r-square |
|---------------|---------------------|--------------|----------------|----------|
| 850           | 1st                 | M850-1       | 0.0132         | 0.9960   |
|               |                     | M850-2       | 0.0131         | 0.9950   |
|               |                     | M850-3       | 0.0121         | 0.9956   |
|               |                     | M850-4       | 0.0130         | 0.9949   |
|               | 2nd                 | M850-1       | 0.0129         | 0.9942   |
|               |                     | M850-2       | 0.0128         | 0.9916   |
|               |                     | M850-3       | 0.0128         | 0.9944   |
|               |                     | M850-4       | 0.0127         | 0.9944   |
| 1000          | 1st                 | M1000-1      | 0.0168         | 0.9946   |
|               |                     | M1000-2      | 0.0167         | 0.9980   |
|               |                     | M1000-3      | 0.0168         | 0.9971   |
|               |                     | M1000-4      | 0.0167         | 0.9974   |
|               | 2nd                 | M1000-1      | 0.0157         | 0.9886   |
|               |                     | M1000-2      | 0.0157         | 0.9943   |
|               |                     | M1000-3      | 0.0158         | 0.9924   |
|               |                     | M1000-4      | 0.0157         | 0.9933   |

**Table S8-** Rate constants calculated for ceria using the four different mixing models at 850 °C and 1000 °C.

| $T_{OX}$ (°C) | H <sub>2</sub> peak | Mixing model | k <sub>0</sub> | r-square |
|---------------|---------------------|--------------|----------------|----------|
| 850           | 1st                 | M850-1       | 0.1784         | 0.9858   |
|               |                     | M850-2       | 0.1697         | 0.9693   |
|               |                     | M850-3       | 0.1703         | 0.9892   |

|      |     |         |        |        |
|------|-----|---------|--------|--------|
|      | 2nd | M850-4  | 0.1561 | 0.9915 |
|      |     | M850-1  | 0.2134 | 0.9935 |
|      |     | M850-2  | 0.2010 | 0.9792 |
|      |     | M850-3  | 0.1953 | 0.9936 |
|      |     | M850-4  | 0.1774 | 0.9937 |
| 1000 | 1st | M1000-1 | 0.0768 | 0.9705 |
|      |     | M1000-2 | 0.0764 | 0.9881 |
|      |     | M1000-3 | 0.0780 | 0.9836 |
|      |     | M1000-4 | 0.0756 | 0.984  |
|      | 2nd | M1000-1 | 0.0744 | 0.9781 |
|      |     | M1000-2 | 0.0737 | 0.9915 |
|      |     | M1000-3 | 0.0759 | 0.9891 |
|      |     | M1000-4 | 0.0738 | 0.9896 |

To ensure that the WS results measured in this study could be fully attributed to the 12*R* phase, we conducted a simulated WS cycle on the 10*H* phase using TGA. We prepared a phase-pure 10*H* sample by reducing a BCM 12*R* sample for 24 h under UHP N<sub>2</sub> flow at 1350 °C. 50.3mg of 10*H* sample was loaded into a Pt crucible and heated under 100 sccm UHP N<sub>2</sub> at 10 °C/min to T<sub>OX</sub> 850 °C. The reduction step was carried out heating the sample to TRE 1350 °C at 99°C/min (the fastest we could heat in the TGA to simulate the laser heating) and holding the temperature for 330 s. The sample was then cooled to T<sub>OX</sub> at the same fast ramp rate and 16 sccm of synthetic air was flowed for 10 min to initiate oxidation. The synthetic air flow was turned off the and UHP N<sub>2</sub> gas was flowed for 10 min to purge the O<sub>2</sub> from the chamber before the subsequent reduction step. Figure S6 shows the TGA simulated run results.

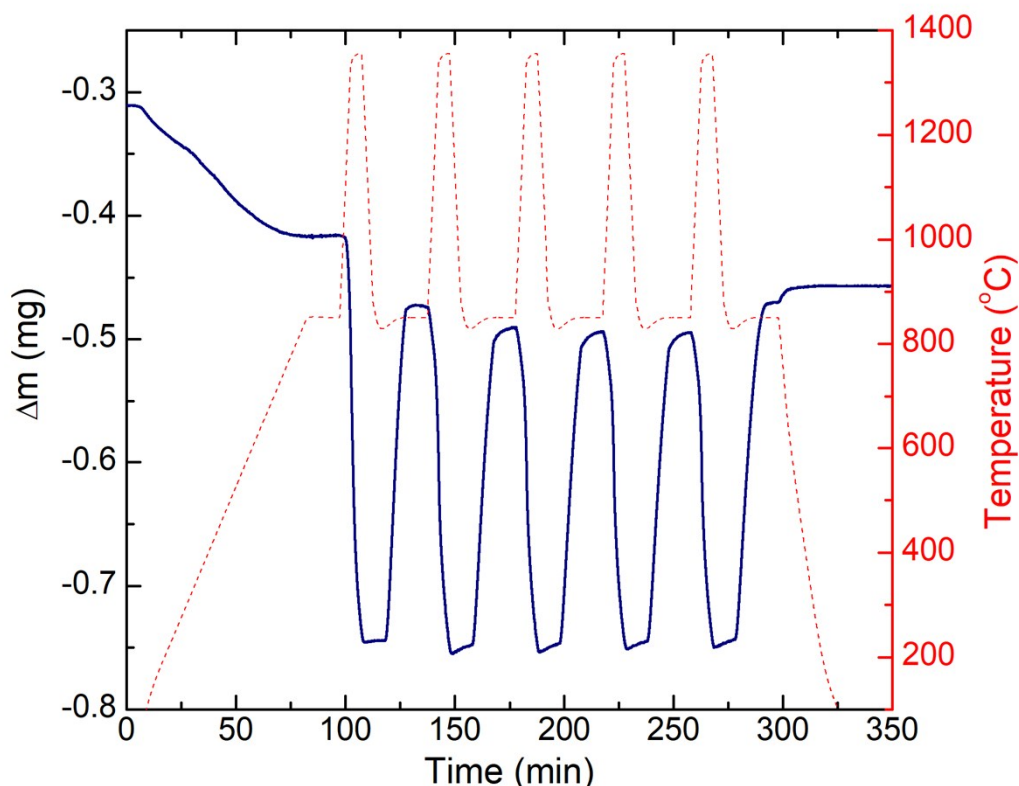

**Figure S6** – 10H sample tested on 5 simulated WS cycles carried out in a TGA. The sample was heated at 10 °C /min to  $T_{OX}$  850 °C in UHP  $N_2$ . The reduction step was done by heating the sample at 99 °C /min to  $T_{RE}$  1350 °C and held for 330s. The sample was then cooled to  $T_{OX}$  at 99 °C /min and 16 sccm of synthetic air (21%  $O_2$  balanced in  $N_2$ ) mixed with 100 sccm of UHP  $N_2$  was flowed for 10 min. The oxidizing flow was turned off and 100 sccm of UHP  $N_2$  purged the chamber for another 10 min preparing the sample for the subsequent reduction cycle.

Figure S7 shows the XRD results on the 10H sample before and after the simulated run. Before TGA cycling, the sample presents only the 10H phase. However, after TGA cycle, the sample is converted entirely to the 12R phase. This demonstrates that under the SFR WS conditions used in this study, any reminiscent 10H phase is converted to the 12R phase.

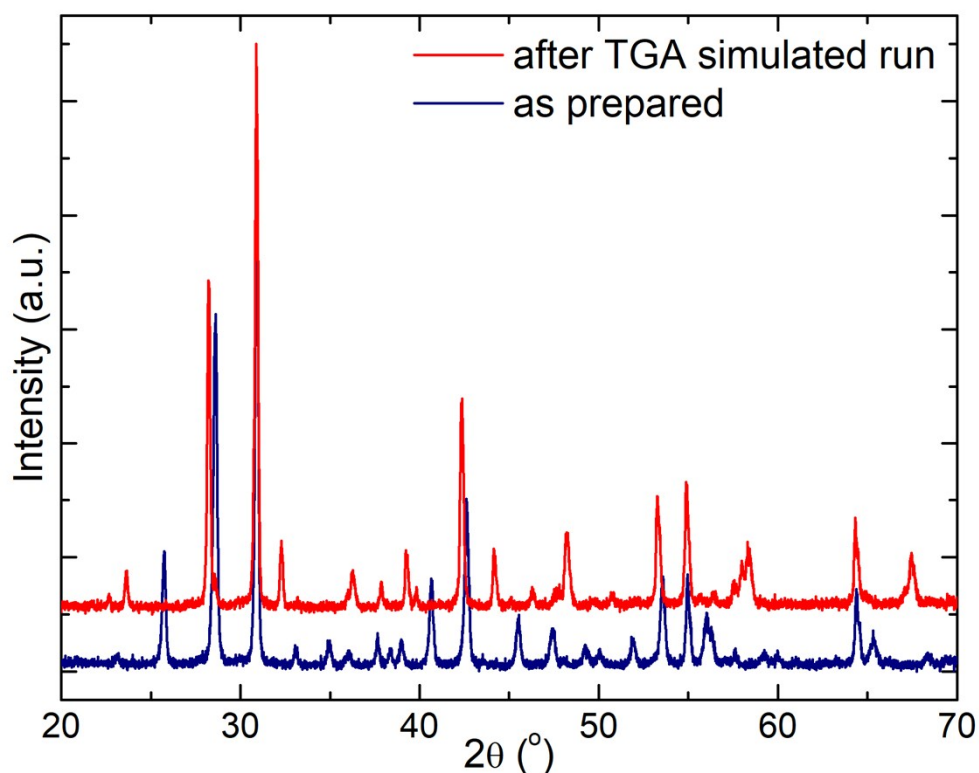

**Figure S7** – XRD done on 10H samples before and after WS simulated runs done in TGA. The as prepared sample indicates the presence of 10H phase, whereas the sample after the TGA WS simulated run indicates that the 10H phase was converted to 12R phase.

## References

- 1 A. M. Deml, V. Stevanović, C. L. Muhich, C. B. Musgrave and R. O’Hayre, *Energy Environ. Sci.*, 2014, **7**, 1996.
- 2 NRELMatDB, <https://materials.nrel.gov>.
- 3 R. Søndena, S. Stølen, P. Ravindran, T. Grande and N. L. Allan, *Phys. Rev. B - Condens. Matter Mater. Phys.*, 2007, **75**, 1–10.
- 4 E. H. P. Cordfunke, A. S. Booiij and M. E. Huntelaar, *J. Chem. Thermodyn.*, 1998, **30**, 437–447.
- 5 M. Aycibin, B. Erdinc and H. Akkus, *J. Electron. Mater.*, 2014, **43**, 4301–4307.
- 6 A. Le Gal, S. Ephane Abanades and G. Flamant, *Energy & Fuels*, 2011, **25**, 4836–4845.
- 7 S. Abanades, A. Legal, A. Cordier, G. Peraudeau, G. Flamant and A. Julbe, *J. Mater. Sci.*, 2010, **45**, 4163–4173.
- 8 N. Gokon, T. Suda and T. Kodama, *Thermochim. Acta*, 2015, **617**, 179–190.

- 9 A. H. McDaniel, A. Ambrosini, E. N. Coker, J. E. Miller, W. C. Chueh, R. O'Hayre and J. Tong, *Energy Procedia*, 2013, **49**, 2009–2018.
- 10 S. Zhai, J. Rojas, N. Ahlborg, K. Lim, M. Toney, H. Jin, W. C. Chueh and A. Majumdar, *Energy Environ. Sci.*, , DOI:10.1039/c8ee00050f.
- 11 A. H. McDaniel, E. C. Miller, D. Arifin, A. Ambrosini, E. N. Coker, R. O'Hayre, W. C. Chueh and J. Tong, *Energy Environ. Sci.*, 2013, **6**, 2424.
- 12 J. R. Scheffe, A. H. A. H. McDaniel, M. D. Allendorf and A. W. Weimer, *Energy Environ. Sci.*, 2013, **6**, 963–973.
